# Supplementary material
Source: PubMed Central journal article supplement (PMC5911177)
Supplement: NIHMS958205-supplement-SI.pdf [file NIHMS958205-supplement-SI.pdf]

**Supporting Information for:**

**Elucidating the Structures of Amyloid Oligomers with Macrocyclic  $\beta$ -Hairpin Peptides: Insights into Alzheimer's Disease and other Amyloid Diseases**

Adam G. Kreutzer and James S. Nowick\*

Department of Chemistry, University of California, Irvine

Irvine, California 92697-2025, United States

\*To whom correspondence should be addressed:  
jsnowick@uci.edu

**This PDF includes:**

|                                                                          |    |
|--------------------------------------------------------------------------|----|
| <b>Early History of Amyloid Fibril Structure Determination</b>           | S2 |
| <b>Supporting Figures and Tables</b>                                     |    |
| <b>Figure S1.</b> Chemical structures of trimers <b>4</b> and <b>5</b> . | S3 |
| <b>Table S1.</b> Amyloid fibril structures deposited in the PDB.         | S4 |
| <b>Table S2.</b> Amyloid monomer structures deposited in the PDB.        | S5 |
| <b>Table S3.</b> Amyloid oligomer structures deposited in the PDB.       | S5 |
| <b>References and Notes</b>                                              | S6 |

## Early History of Amyloid Fibril Structure Determination

A $\beta$  is the most extensively characterized of the more than thirty known amyloidogenic peptides and proteins and has served as the archetype for studying the structures of amyloid assemblies. X-ray diffraction measurements initially revealed that amyloid plaques produced a “cross- $\beta$ ” pattern, indicating that the proteinaceous components of the plaques have a “pleated sheet” conformation and providing a glimpse into the molecular structures of amyloid fibrils.<sup>1,2,3</sup> The determination of the sequences of the 40- and 42-amino acid alloforms of A $\beta$  (A $\beta$ <sub>40</sub> and A $\beta$ <sub>42</sub>) provided the next piece of the puzzle.<sup>4,5</sup> Solid-state NMR spectroscopy (ss-NMR) and X-ray diffraction of fibrils established that the fibrils are composed of an extended network of in-register parallel  $\beta$ -sheets, with the  $\beta$ -strands running perpendicular to the long axes of the fibrils and the hydrogen bonds running parallel.<sup>6,7,8,9,10,11,12,13,14,15,16</sup> These studies produced the first molecular models of amyloid fibrils.

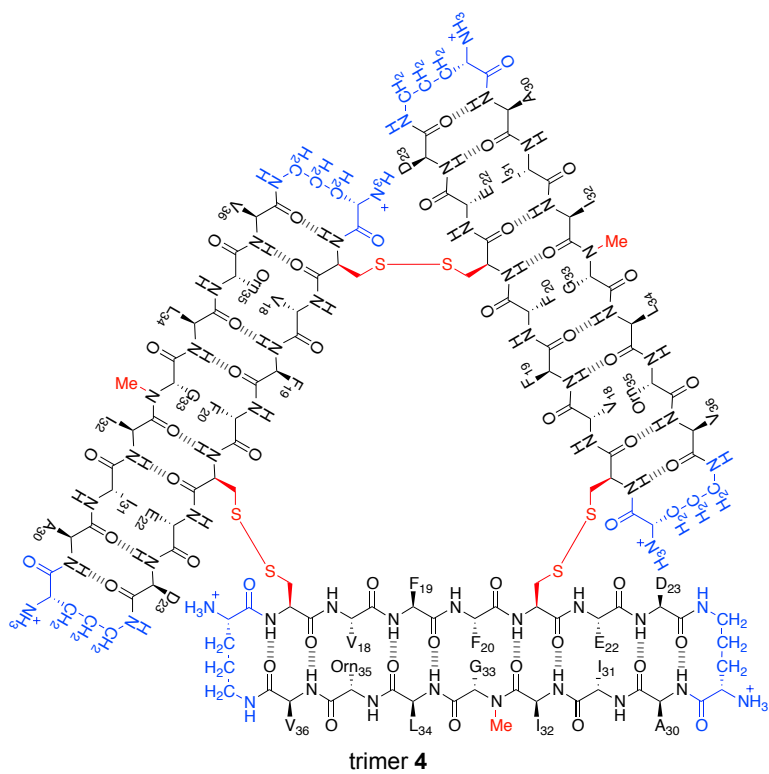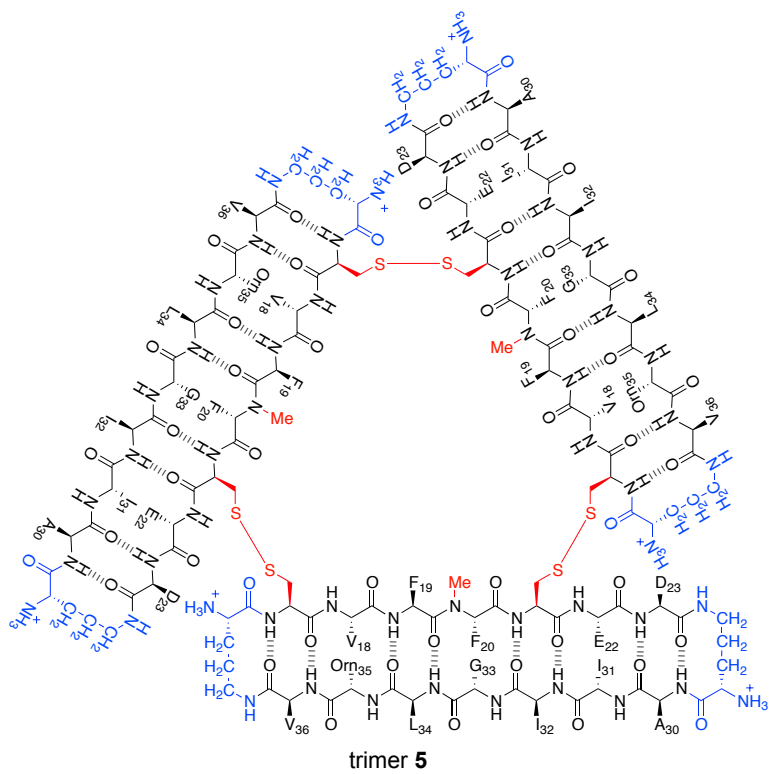

**Figure S1.** Chemical structures of trimers 4 and 5.

**Table S1.** Amyloid fibril structures deposited in the PDB.

| peptide/protein                         | disease       | approach | PDB ID                                                                                                                      | technique       | comments and mutations                                      |
|-----------------------------------------|---------------|----------|-----------------------------------------------------------------------------------------------------------------------------|-----------------|-------------------------------------------------------------|
| A $\beta$ <sub>40</sub>                 | AD            | A        | 2M4J <sup>17</sup> , 2LMP, 2LMQ, 2LMN and 2LMO <sup>18,19</sup>                                                             | ss-NMR          |                                                             |
| A $\beta$ <sub>40</sub>                 | AD            | A        | 2LNQ <sup>20</sup>                                                                                                          | ss-NMR          | D23N (Iowa mutant)                                          |
| A $\beta$ <sub>40</sub>                 | AD            | A        | 2MVX <sup>21</sup>                                                                                                          | ss-NMR          | E22 $\Delta$ (Osaka mutant)                                 |
| A $\beta$ <sub>42</sub>                 | AD            | A        | 2NAO <sup>22</sup> , 5KK3 <sup>23</sup> , 2MXU <sup>24</sup> , 5AEF <sup>25</sup> , 2BEG <sup>26</sup> , 5OQV <sup>27</sup> | ss-NMR, cryo-EM |                                                             |
| A $\beta$ <sub>15-40</sub>              | AD            | B        | 2MPZ <sup>28</sup>                                                                                                          | ss-NMR          | D23N (Iowa mutant)                                          |
| A $\beta$ <sub>15-23</sub>              | AD            | C        | 4Q8D <sup>29</sup>                                                                                                          | X-ray           |                                                             |
| A $\beta$ <sub>15-36</sub>              | AD            | D        | 5V64 <sup>30</sup>                                                                                                          | X-ray           | F19F <sup>p-iodo</sup> , A $\beta$ <sub>22-29</sub> omitted |
| A $\beta$ <sub>16-21</sub>              | AD            | B        | 2Y2A, 3OW9, and 2Y29 <sup>31</sup>                                                                                          | X-ray           |                                                             |
| A $\beta$ <sub>27-32</sub>              | AD            | B        | 3Q2X <sup>31</sup>                                                                                                          | X-ray           |                                                             |
| A $\beta$ <sub>29-34</sub>              | AD            | B        | 3PZZ <sup>31</sup>                                                                                                          | X-ray           |                                                             |
| A $\beta$ <sub>35-40</sub>              | AD            | B        | 2OKZ and 2ONA <sup>32</sup>                                                                                                 | X-ray           |                                                             |
| A $\beta$ <sub>35-42</sub>              | AD            | B        | 2Y3K and 2Y3L <sup>32</sup>                                                                                                 | X-ray           |                                                             |
| A $\beta$ <sub>37-42</sub>              | AD            | B        | 2ONV <sup>32</sup>                                                                                                          | X-ray           |                                                             |
| $\alpha$ -syn                           | PD            | A        | 2N0A <sup>33</sup>                                                                                                          | ss-NMR          |                                                             |
| $\alpha$ -syn <sub>47-56</sub>          | PD            | B        | 4ZNN <sup>34</sup>                                                                                                          | EC              | A53T                                                        |
| $\alpha$ -syn <sub>69-77</sub>          | PD            | B        | 4RIK <sup>34</sup>                                                                                                          | X-ray           |                                                             |
| $\alpha$ -syn <sub>68-78</sub>          | PD            | B        | 4RIL <sup>34</sup>                                                                                                          | EC              |                                                             |
| $\alpha$ -syn <sub>72-78</sub>          | PD            | B        | 4R0U <sup>35</sup>                                                                                                          | X-ray           |                                                             |
| $\alpha$ -syn <sub>70-76</sub>          | PD            | B        | 4R0W <sup>35</sup>                                                                                                          | X-ray           |                                                             |
| tau                                     | AD            | A        | 5O3O, 5O3T <sup>36</sup>                                                                                                    | cryo-EM         |                                                             |
| tau <sub>VQIVYK</sub>                   | AD            | B        | 5K7N <sup>37</sup> , 4NP8 <sup>38</sup> , 2ON9 <sup>32</sup>                                                                | EC, X-ray       |                                                             |
| IAPP <sub>15-25</sub>                   | T2D           | B        | 5K00 <sup>39</sup>                                                                                                          | EC              |                                                             |
| IAPP <sub>19-29</sub>                   | T2D           | B        | 5KNZ <sup>39</sup>                                                                                                          | EC              | S20G                                                        |
| IAPP <sub>22-28</sub>                   | T2D           | B        | 5E5V <sup>40</sup>                                                                                                          | X-ray           |                                                             |
| IAPP <sub>13-18</sub>                   | T2D           | B        | 5E5X <sup>40</sup>                                                                                                          | X-ray           |                                                             |
| IAPP <sub>16-21</sub>                   | T2D           | B        | 5E5Z <sup>40</sup>                                                                                                          | X-ray           |                                                             |
| IAPP <sub>23-29</sub>                   | T2D           | B        | 5E61 <sup>40</sup>                                                                                                          | X-ray           |                                                             |
| IAPP <sub>18-23</sub>                   | T2D           | B        | 3FPO <sup>38</sup>                                                                                                          | X-ray           |                                                             |
| IAPP <sub>14-19</sub>                   | T2D           | B        | 3FRI <sup>38</sup>                                                                                                          | X-ray           |                                                             |
| IAPP <sub>14-20</sub>                   | T2D           | B        | 3FTH <sup>38</sup>                                                                                                          | X-ray           |                                                             |
| IAPP <sub>31-37</sub>                   | T2D           | B        | 3FTK <sup>38</sup>                                                                                                          | X-ray           |                                                             |
| IAPP <sub>28-33</sub>                   | T2D           | B        | 3DG1 <sup>41</sup>                                                                                                          | X-ray           |                                                             |
| IAPP <sub>21-27</sub>                   | T2D           | B        | 3DGJ <sup>41</sup>                                                                                                          | X-ray           |                                                             |
| TTR <sub>105-115</sub>                  | SSA, FAP, FAC | B        | 1RV5 <sup>42</sup> , 2M5K, 2M5M, 2M5N, and 3ZPK <sup>43</sup>                                                               | ss-NMR, EM      |                                                             |
| TTR <sub>106-121</sub>                  | SSA, FAP, FAC | D        | 5HPP                                                                                                                        | X-ray           | TTR <sub>113-114</sub> omitted                              |
| TTR <sub>111-116</sub>                  | SSA, FAP, FAC | B        | 4XFN <sup>44</sup>                                                                                                          | X-ray           |                                                             |
| TTR <sub>139-144</sub>                  | SSA, FAP, FAC | B        | 4XFO <sup>44</sup>                                                                                                          | X-ray           |                                                             |
| hPrP <sub>170-175</sub>                 | CJD           | B        | 2OL9 <sup>32</sup>                                                                                                          | X-ray           |                                                             |
| $\alpha$ B crystallin <sub>95-100</sub> | N/A           | B        | 3SGS <sup>62</sup>                                                                                                          | X-ray           |                                                             |
| B2M <sub>20-41</sub>                    | DRA           | B        | 2E8D <sup>45</sup>                                                                                                          | ss-NMR          |                                                             |
| B2M <sub>74-79</sub>                    | DRA           | B        | 3LOZ <sup>46</sup>                                                                                                          | X-ray           |                                                             |
| HET <sub>S218-289</sub>                 | N/A           | B        | 2KJ3 <sup>47</sup> , 2RNM <sup>48</sup>                                                                                     | ss-NMR          |                                                             |

**disease:** AD = Alzheimer's disease, PD = Parkinson's disease, T2D = type 2 diabetes, DRA = dialysis related amyloidosis, SSA = senile systemic amyloidosis, FAP = familial amyloid polyneuropathy, FAC = familial amyloid cardiomyopathy, CJD = Creutzfeldt Jakob disease, N/A = not applicable

**approach:** A = full-length peptide or protein, B = peptide fragment, C = macrocyclic  $\beta$ -sheet peptide, D = macrocyclic  $\beta$ -hairpin peptide

**technique:** X-ray = X-ray crystallography, ss-NMR = solid-state NMR spectroscopy, EM = electron microscopy, cryo-EM = cryo-electron microscopy, EC = electron crystallography

**Table S2.** Amyloid monomer structures deposited in the PDB.

| peptide/protein            | disease | approach | PDB ID                      | technique | comments and mutations                    |
|----------------------------|---------|----------|-----------------------------|-----------|-------------------------------------------|
| A $\beta$ <sub>40</sub>    | AD      | A        | 2LFM <sup>49</sup>          | NMR       |                                           |
| A $\beta$ <sub>40</sub>    | AD      | A        | 1BA4 <sup>50</sup>          | NMR       |                                           |
| A $\beta$ <sub>40</sub>    | AD      | A        | 2OTK <sup>51</sup>          | NMR       | A $\beta$ <sub>40</sub> /affibody complex |
| A $\beta$ <sub>1-28</sub>  | AD      | B        | 1BJB and 1BJC <sup>52</sup> | NMR       |                                           |
| A $\beta$ <sub>17-34</sub> | AD      | B        | 2MJ1 <sup>53</sup>          | NMR       |                                           |
| $\alpha$ -syn              | PD      | A        | 4BXL <sup>54</sup>          | NMR       | $\alpha$ -syn/affibody complex            |
| $\alpha$ -syn              | PD      | A        | 2KKW <sup>55</sup>          | NMR       | $\alpha$ -syn/micelle complex             |
| $\alpha$ -syn              | PD      | A        | 1XQ8 <sup>56</sup>          | NMR       | $\alpha$ -syn/micelle complex             |
| IAPP                       | T2D     | A        | 5MGQ <sup>57</sup>          | NMR       |                                           |
| IAPP                       | T2D     | A        | 5K5G <sup>58</sup>          | NMR       | IAPP/affibody complex                     |
| IAPP                       | T2D     | A        | 2KJ7 <sup>59</sup>          | NMR       |                                           |
| IAPP                       | T2D     | A        | 2KB8 <sup>60</sup>          | NMR       | IAPP/micelle complex                      |
| IAPP                       | T2D     | A        | 2L86 <sup>61</sup>          | NMR       | IAPP/micelle complex                      |

**disease:** AD = Alzheimer's disease, PD = Parkinson's disease, T2D = type 2 diabetes

**approach:** A = full-length peptide, B = peptide fragment

**technique:** NMR = solution-state NMR spectroscopy

**Table S3.** Amyloid oligomer structures deposited in the PDB.

| peptide/protein                         | disease | approach | PDB ID                                                     | technique | comments and mutations                                                   |
|-----------------------------------------|---------|----------|------------------------------------------------------------|-----------|--------------------------------------------------------------------------|
| $\alpha$ B crystallin <sub>90-100</sub> | N/A     | B        | 3SGN, 3SGO, 3SGP, and 3SGR <sup>62</sup>                   | X-ray     | antiparallel $\beta$ -sheet cylindrin                                    |
| SOD1 <sub>28-38</sub>                   | ALS     | B        | 5IHW <sup>63</sup>                                         | X-ray     | antiparallel $\beta$ -sheet corkscrew, P28K                              |
| hPrP <sub>177-182</sub>                 | CJD     | B        | 4E1I and 4E1H <sup>64</sup>                                | X-ray     | disulfide stabilized antiparallel $\beta$ -sheet                         |
| A $\beta$ <sub>15-23</sub>              | AD      | C        | 4IVH <sup>65</sup>                                         | X-ray     |                                                                          |
| A $\beta$ <sub>16-36</sub>              | AD      | D        | 5V63 <sup>30</sup>                                         | X-ray     | F19F <sup>p-iodo</sup> , A $\beta$ <sub>23-29</sub> omitted              |
| A $\beta$ <sub>16-36</sub>              | AD      | D        | 5W4H <sup>66</sup>                                         | X-ray     | A $\beta$ <sub>23-29</sub> omitted                                       |
| A $\beta$ <sub>17-21</sub>              | AD      | C        | 3Q9H <sup>67</sup>                                         | X-ray     | F19F <sup>p-iodo</sup> , A $\beta$ <sub>23-29</sub> omitted              |
| A $\beta$ <sub>17-36</sub>              | AD      | D        | 4NTR and 4NW9 <sup>68</sup>                                | X-ray     | M35Orn, A $\beta$ <sub>24-29</sub> omitted                               |
| A $\beta$ <sub>17-36</sub>              | AD      | D        | 5SUT and 5SUR <sup>69</sup>                                | X-ray     | stabilized trimers, M35Orn, A $\beta$ <sub>24-29</sub> omitted           |
| A $\beta$ <sub>17-36</sub>              | AD      | D        | 5V65 <sup>30</sup>                                         | X-ray     | F19F <sup>p-iodo</sup> , A $\beta$ <sub>24-29</sub> omitted              |
| A $\beta$ <sub>17-36</sub>              | AD      | E        | 5HOX <sup>70</sup>                                         | X-ray     | V24C, G29C                                                               |
| A $\beta$ <sub>30-34</sub>              | AD      | C        | 3Q9J <sup>4</sup>                                          | X-ray     | G33F                                                                     |
| A $\beta$ <sub>30-36</sub>              | AD      | C        | 3T4G <sup>71</sup>                                         | X-ray     |                                                                          |
| $\alpha$ -syn <sub>36-55</sub>          | PD      | D        | 5F1T <sup>72</sup>                                         | X-ray     | G36A and Y39F <sup>p-iodo</sup> , $\alpha$ -syn <sub>42-49</sub> omitted |
| tau <sub>VQIVY</sub>                    | AD      | C        | 3Q9G <sup>67</sup>                                         | X-ray     |                                                                          |
| tau <sub>SVQIVYK</sub>                  | AD      | C        | 4E0M, 4E0N, and 4E0O <sup>73</sup>                         | X-ray     |                                                                          |
| B2M <sub>58-63</sub>                    | DRA     | C        | 4E0K <sup>73</sup>                                         | X-ray     |                                                                          |
| B2M <sub>62-68</sub>                    | DRA     | C        | 4E0L <sup>73</sup>                                         | X-ray     |                                                                          |
| B2M <sub>63-69</sub>                    | DRA     | D        | 4P4V, 4P4W, 4P4X, 4P4Y, 4P4Z, 4WC8, and 4X0S <sup>74</sup> | X-ray     | Y66F <sup>p-iodo</sup>                                                   |
| IAPP <sub>11-17</sub>                   | T2D     | C        | 5UHR <sup>75</sup>                                         | X-ray     | R11Cit                                                                   |

**disease:** ALS = amyotrophic lateral sclerosis, CJD = Creutzfeldt Jakob disease, AD = Alzheimer's disease, PD = Parkinson's disease, DRA = dialysis related amyloidosis, T2D = type 2 diabetes, N/A = not applicable

**approach:** B = peptide fragment, C = macrocyclic  $\beta$ -sheet peptide, D = macrocyclic  $\beta$ -hairpin peptide, E = stabilized  $\beta$ -hairpin

**technique:** X-ray = X-ray crystallography

## References and Notes

- 1 Eanes, E. D.; Glenner, G. G. X-ray Diffraction Studies on Amyloid Filaments. *J. Histochem. Cytochem.* **1968**, *16*, 673–677.
- 2 Glenner, G. G.; Wong, C. W. Alzheimer's Disease: Initial Report of the Purification and Characterization of a Novel Cerebrovascular Amyloid Protein. *Biochem. Biophys. Res. Commun.* **1984**, *120*, 885–890.
- 3 Kirschner, D. A.; Abraham, C.; Selkoe, D. J. X-ray Diffraction from Intraneuronal Paired Helical Filaments and Extraneuronal Amyloid Fibers in Alzheimer Disease Indicates Cross-Beta Conformation. *Proc. Natl. Acad. Sci. U.S.A.* **1986**, *83*, 503–507.
- 4 Masters, C. L.; Simms, G.; Weinman, N. A.; Multhaup, G.; McDonald, B. L.; Beyreuther, K. Amyloid Plaque Core Protein in Alzheimer Disease and Down Syndrome. *Proc. Natl. Acad. Sci. U.S.A.* **1985**, *82*, 4245–4249.
- 5 Kang, J.; Lemaire, H. G.; Unterbeck, A.; Salbaum, J. M.; Masters, C. L.; Grzeschik, K. H.; Multhaup, G.; Beyreuther, K.; Müller-Hill, B. The Precursor of Alzheimer's Disease Amyloid A4 Protein Resembles a Cell-Surface Receptor. *Nature* **1987**, *325*, 733–736.
- 6 Blake, C.; Serpell, L. Synchrotron X-ray Studies Suggest that the Core of the Transthyretin Amyloid Fibril is a Continuous  $\beta$ -Sheet Helix. *Structure* **1996**, *4*, 989–998.
- 7 Malinchik, S. B.; Inouye, H.; Szumowski, K. E.; Kirschner, D. A. Structural Analysis of Alzheimer's  $\beta(1-40)$  Amyloid: Protofilament Assembly of Tubular Fibrils. *Biophys. J.* **1998**, *74*, 537–545.
- 8 Sunde, M.; Serpell, L. C.; Bartlam, M.; Fraser, P. E.; Pepys, M. B.; Blake, C. C. Common Core Structure of Amyloid Fibrils by Synchrotron X-ray Diffraction. *J. Mol. Biol.* **1997**, *273*, 729–739.

- 9 Benzinger, T. L.; Gregory, D. M.; Burkoth, T. S.; Miller-Auer, H.; Lynn, D. G.; Botto, R. E.; Meredith, S. C. Propagating Structure of Alzheimer's  $\beta$ -Amyloid(10-35) is Parallel  $\beta$ -Sheet with Residues in Exact Register. *Proc. Natl. Acad. Sci. U.S.A.* **1998**, *95*, 13407–13412.
- 10 Gregory, D. M.; Benzinger, T. L.; Burkoth, T. S.; Miller-Auer, H.; Lynn, D. G.; Meredith, S. C.; Botto, R. E. Dipolar Recoupling NMR of Biomolecular Self-Assemblies: Determining Inter- and Intrastrand Distances in Fibrilized Alzheimer's  $\beta$ -Amyloid Peptide. *Solid State Nucl. Magn. Reson.* **1998**, *13*, 149–166.
- 11 Benzinger, T. L.; Gregory, D. M.; Burkoth, T. S.; Miller-Auer, H.; Lynn, D. G.; Botto, R. E.; Meredith, S. C. Two-Dimensional Structure of  $\beta$ -Amyloid(10-35) Fibrils. *Biochemistry* **2000**, *39*, 3491–3499.
- 12 Antzutkin, O. N.; Balbach, J. J.; Leapman, R. D.; Rizzo, N. W.; Reed, J.; Tycko, R. Multiple Quantum Solid-State NMR Indicates a Parallel, not Antiparallel, Organization of  $\beta$ -Sheets in Alzheimer's  $\beta$ -Amyloid Fibrils. *Proc. Natl. Acad. Sci. U.S.A.* **2000**, *97*, 13045–13050.
- 13 Burkoth, T. S.; Benzinger, T. L. S.; Urban V.; Morgan, D. M.; Gregory, D. M.; Thiagarajan, P.; Botto, R. E.; Meredith, S. C.; Lynn, D. G. Structure of the  $\beta$ -Amyloid(10-35) Fibril. *J. Am. Chem. Soc.* **2000**, *122*, 7883–7889.
- 14 Antzutkin, O. N.; Leapman, R. D.; Balbach, J. J.; Tycko, R. Supramolecular Structural Constraints on Alzheimer's  $\beta$ -Amyloid Fibrils from Electron Microscopy and Solid-State Nuclear Magnetic Resonance. *Biochemistry* **2002**, *41*, 15436–15450.
- 15 Petkova, A. T.; Ishii, Y.; Balbach, J. J.; Antzutkin, O. N.; Leapman, R. D.; Delaglio, F.; Tycko, R. A Structural Model for Alzheimer's  $\beta$ -Amyloid Fibrils Based on Experimental Constraints from Solid State NMR. *Proc. Natl. Acad. Sci. U.S.A.* **2002**, *99*, 16742–16747.

- 16 Sikorski, P.; Atkins, E. D.; Serpell, L. C. Structure and Texture of Fibrous Crystals Formed by Alzheimer's A $\beta$ (11-25) Peptide Fragment. *Structure* **2003**, *11*, 915–926.
- 17 Lu, J. X.; Qiang, W.; Yau, W. M.; Schwieters, C. D.; Meredith, S. C.; Tycko, R. Molecular Structure of  $\beta$ -amyloid Fibrils in Alzheimer's Disease Brain Tissue. *Cell* **2013**, *154*, 1257–1268.
- 18 Paravastu, A. K.; Leapman, R. D.; Yau, W. M.; Tycko, R. Molecular Structural Basis for Polymorphism in Alzheimer's  $\beta$ -Amyloid Fibrils. *Proc. Natl. Acad. Sci. U.S.A.* **2008**, *105*, 18349–18354.
- 19 Petkova, A. T.; Yau, W. M.; Tycko, R. Experimental Constraints on Quaternary Structure in Alzheimer's  $\beta$ -Amyloid Fibrils. *Biochemistry* **2006**, *45*, 498–512.
- 20 Qiang, W.; Yau, W. M.; Luo, Y.; Mattson, M. P.; Tycko, R. Antiparallel  $\beta$ -sheet Architecture in Iowa-Mutant  $\beta$ -Amyloid Fibrils. *Proc. Natl. Acad. Sci. U.S.A.* **2012**, *109*, 4443–4448.
- 21 Schütz, A. K.; Vagt, T.; Huber, M.; Ovchinnikova, O. Y.; Cadalbert, R.; Wall, J.; Güntert, P.; Böckmann, A.; Glockshuber, R.; Meier, B. H. Atomic-Resolution Three-Dimensional Structure of Amyloid  $\beta$  Fibrils Bearing the Osaka Mutation. *Angew. Chem. Int. Ed. Engl.* **2015**, *54*, 331–335.
- 22 Wälti, M. A.; Ravotti, F.; Arai, H.; Glabe, C. G.; Wall, J. S.; Böckmann, A.; Güntert, P.; Meier, B. H.; Riek, R. Atomic-Resolution Structure of a Disease-Relevant A $\beta$ (1-42) Amyloid Fibril. *Proc. Natl. Acad. Sci. U.S.A.* **2016**, *113*, 4976–4984.
- 23 Colvin, M. T.; Silvers, R.; Ni, Q. Z.; Can, T. V.; Sergeyev, I.; Rosay, M.; Donovan, K. J.; Michael, B.; Wall, J.; Linse, S.; Griffin, R. G. Atomic Resolution Structure of Monomorphic A $\beta$ 42 Amyloid Fibrils. *J. Am. Chem. Soc.* **2016**, *138*, 9663–9674.



- 24 Xiao, Y.; Ma, B.; McElheny, D.; Parthasarathy, S.; Long, F.; Hoshi, M.; Nussinov, R.; Ishii, Y. A $\beta$ (1-42) Fibril Structure Illuminates Self-Recognition and Replication of Amyloid in Alzheimer's Disease. *Nat. Struct. Mol. Biol.* **2015**, *22*, 499–505.
- 25 Schmidt, M.; Rohou, A.; Lasker, K.; Yadav, J. K.; Schiene-Fischer C.; Fändrich, M.; Grigorieff, N. Peptide Dimer Structure in an A $\beta$ (1-42) Fibril Visualized with Cryo-EM. *Proc. Natl. Acad. Sci. U.S.A.* **2015**, *112*, 11858–11863.
- 26 Lührs, T.; Ritter, C.; Adrian, M.; Riek-Loher, D.; Bohrmann, B.; Döbeli, H.; Schubert, D.; Riek, R. 3D Structure of Alzheimer's Amyloid-beta(1-42) Fibrils. *Proc. Natl. Acad. Sci. U.S.A.* **2005**, *102*, 17342–17347.
- 27 Gremer, L.; Schölzel, D.; Schenk, C.; Reinartz, E.; Labahn, J.; Ravelli, R. B. G.; Tusche, M.; Lopez-Iglesias, C.; Hoyer, W.; Heise, H.; Willbold, D.; Schröder, G. F. Fibril Structure of Amyloid- $\beta$ (1-42) by Cryoelectron Microscopy. *Science* **2017**, doi: 10.1126/science.aao2825.
- 28 Sgourakis, N. G.; Yau, W. M.; Qiang, W. Modeling an In-Register, Parallel "Iowa" A $\beta$  Fibril Structure using Solid-State NMR Data from Labeled Samples with Rosetta. *Structure* **2015**, *23*, 216–227.
- 29 Pham, J. D.; Spencer, R. K.; Chen, K. H.; Nowick, J. S. A Fibril-Like Assembly of Oligomers of a Peptide Derived from  $\beta$ -Amyloid. *J. Am. Chem. Soc.* **2014**, *136*, 12682–12690.
- 30 Salveson, P. J.; Spencer, R. K.; Kreutzer, A. G.; Nowick, J. S. X-ray Crystallographic Structure of a Compact Dodecamer from a Peptide Derived from A $\beta$ <sub>16–22</sub>. *Org. Lett.* **2017**, *19*, 3462–3465.

- 31 Colletier, J. P.; Laganowsky, A.; Landau, M.; Zhao, M.; Soriaga, A. B.; Goldschmidt, L.; Flot, D.; Cascio, D.; Sawaya, M. R.; Eisenberg, D. Molecular Basis for Amyloid- $\beta$  Polymorphism. *Proc. Natl. Acad. Sci. U.S.A.* **2011**, *108*, 16938–16943.
- 32 Sawaya, M. R.; Sambashivan, S.; Nelson, R.; Ivanova, M. I.; Sievers, S. A.; Apostol, M. I.; Thompson, M. J.; Balbirnie, M.; Wiltzius, J. J.; McFarlane, H. T.; Madsen, A. Ø.; Riek, C.; Eisenberg, D. Atomic Structures of Amyloid Cross-Beta Spines Reveal Varied Steric Zippers. *Nature* **2007**, *447*, 453–457.
- 33 Tuttle, M. D.; Comellas, G.; Nieuwkoop, A. J.; Covell, D. J.; Berthold, D. A.; Kloepper, K. D.; Courtney, J. M.; Kim, J. K.; Barclay, A. M.; Kendall, A.; Wan, W.; Stubbs, G.; Schwieters, C. D.; Lee, V. M.; George, J. M.; Rienstra, C. M. Solid-State NMR Structure of a Pathogenic Fibril of Full-Length Human  $\alpha$ -Synuclein. *Nat. Struct. Mol. Biol.* **2016**, *23*, 409–415.
- 34 Rodriguez, J. A.; Ivanova, M. I.; Sawaya, M. R.; Cascio, D.; Reyes, F. E.; Shi, D.; Sangwan, S.; Guenther, E. L.; Johnson, L. M.; Zhang, M.; Jiang, L.; Arbing, M. A.; Nannenga, B. L.; Hattne, J.; Whitelegge, J.; Brewster, A. S.; Messerschmidt, M.; Boutet, S.; Sauter, N. K.; Gonen, T.; Eisenberg, D. S. Structure of the Toxic Core of  $\alpha$ -Synuclein from Invisible Crystals. *Nature* **2015**, *525*, 486–490.
- 35 Li, D.; Jones, E. M.; Sawaya, M. R.; Furukawa, H.; Luo, F.; Ivanova, M.; Sievers, S. A.; Wang, W.; Yaghi, O. M.; Liu, C.; Eisenberg, D. S. Structure-Based Design of Functional Amyloid Materials. *J. Am. Chem. Soc.* **2014**, *136*, 18044–18051.
- 36 Fitzpatrick, A. W. P.; Falcon, B.; He, S.; Murzin, A. G.; Murshudov, G.; Garringer, H. J.; Crowther, R. A.; Ghetti, B.; Goedert, M.; Scheres, S. H. W. Cryo-EM Structures of Tau Filaments from Alzheimer's Disease. *Nature* **2017**, *547*, 185–190.

- 37 de la Cruz, M. J.; Hattne, J.; Shi, D.; Seidler, P.; Rodriguez, J.; Reyes, F. E.; Sawaya, M. R.; Cascio, D.; Weiss, S. C.; Kim, S. K.; Hinck, C. S.; Hinck, A. P.; Calero, G.; Eisenberg, D.; Gonen, T. Atomic-Resolution Structures from Fragmented Protein Crystals with the CryoEM Method MicroED. *Nat. Methods* **2017**, *14*, 399–402.
- 38 Wiltzius, J. J.; Landau, M.; Nelson, R.; Sawaya, M. R.; Apostol, M. I.; Goldschmidt, L.; Soriaga, A. B.; Cascio, D.; Rajashankar, K.; Eisenberg, D. Molecular Mechanisms for Protein-Encoded Inheritance. *Nat. Struct. Mol. Biol.* **2009**, *16*, 973–978.
- 39 Krotee, P.; Rodriguez, J. A.; Sawaya, M. R.; Cascio, D.; Reyes, F. E.; Shi, D.; Hattne, J.; Nannenga, B. L.; Oskarsson, M. E.; Philipp, S.; Griner, S.; Jiang, L.; Glabe, C. G.; Westermark, G. T.; Gonen, T.; Eisenberg, D. S. Atomic Structures of Fibrillar Segments of hIAPP Suggest Tightly Mated  $\beta$ -Sheets are Important for Cytotoxicity. *Elife* **2017**, *6*, pii: e19273. doi: 10.7554/eLife.19273.
- 40 Soriaga, A. B.; Sangwan, S.; Macdonald, R.; Sawaya, M. R.; Eisenberg, D. Crystal Structures of IAPP Amyloidogenic Segments Reveal a Novel Packing Motif of Out-of-Register Beta Sheets. *J. Phys. Chem. B.* **2016**, *120*, 5810–5816.
- 41 Wiltzius, J. J.; Sievers, S. A.; Sawaya, M. R.; Cascio, D.; Popov, D.; Riek, C.; Eisenberg, D. Atomic Structure of the Cross-Beta Spine of Islet Amyloid Polypeptide (Amylin). *Protein Sci.* **2008**, *17*, 1467–1474.
- 42 Jaroniec, C. P.; MacPhee, C. E.; Bajaj, V. S.; McMahon, M. T.; Dobson, C. M.; Griffin, R. G. High-Resolution Molecular Structure of a Peptide in an Amyloid Fibril Determined by Magic Angle Spinning NMR Spectroscopy. *Proc. Natl. Acad. Sci. U.S.A.* **2004**, *101*, 711–716.

- 43 Fitzpatrick, A. W.; Debelouchina, G. T.; Bayro, M. J.; Clare, D. K.; Caporini, M. A.; Bajaj, V. S.; Jaroniec, C. P.; Wang, L.; Ladizhansky, V.; Müller, S. A.; MacPhee, C. E.; Waudby, C. A.; Mott, H. R.; De Simone, A.; Knowles, T. P.; Saibil, H. R.; Vendruscolo, M.; Orlova, E. V.; Griffin, R. G.; Dobson, C. M. Atomic Structure and Hierarchical Assembly of a Cross- $\beta$  Amyloid Fibril. *Proc. Natl. Acad. Sci. U.S.A.* **2013**, *110*, 5468–5473.
- 44 Saelices, L.; Johnson, L. M.; Liang, W. Y.; Sawaya, M. R.; Cascio, D.; Ruchala, P.; Whitelegge, J.; Jiang, L.; Riek, R.; Eisenberg, D. S. Uncovering the Mechanism of Aggregation of Human Transthyretin. *J. Biol. Chem.* **2015**, *290*, 28932–28943.
- 45 Iwata, K.; Fujiwara, T.; Matsuki, Y.; Akutsu, H.; Takahashi, S.; Naiki, H.; Goto, Y. 3D Structure of Amyloid Protofilaments of  $\beta_2$ -Microglobulin Fragment Probed by Solid-State NMR. *Proc. Natl. Acad. Sci. U.S.A.* **2006**, *103*, 18119–18124.
- 46 Liu, C.; Sawaya, M. R.; Eisenberg, D.  $\beta_2$ -Microglobulin Forms Three-Dimensional Domain-Swapped Amyloid Fibrils with Disulfide Linkages. *Nat. Struct. Mol. Biol.* **2011**, *18*, 49–55.
- 47 Van Melckebeke, H.; Wasmer, C.; Lange, A.; Ab, E.; Loquet, A.; Böckmann, A.; Meier, B. H. Atomic-Resolution Three-Dimensional Structure of HET-s(218-289) Amyloid Fibrils by Solid-State NMR Spectroscopy. *J. Am. Chem. Soc.* **2010**, *132*, 13765–13775.
- 48 Wasmer, C.; Lange, A.; Van Melckebeke, H.; Siemer, A. B.; Riek, R.; Meier, B. H. Amyloid Fibrils of the HET-s(218-289) Prion Form a  $\beta$  Solenoid with a Triangular Hydrophobic Core. *Science* **2008**, *319*, 1523–1526.
- 49 Vivekanandan, S.; Brender, J. R.; Lee, S. Y.; Ramamoorthy, A. A Partially Folded Structure of Amyloid-beta(1-40) in an Aqueous Environment. *Biochem. Biophys. Res. Commun.* **2011**, *411*, 312–316.

- 50 Coles, M.; Bicknell, W.; Watson, A. A.; Fairlie, D. P.; Craik, D. J. Solution Structure of Amyloid Beta-Peptide(1-40) in a Water-Micelle Environment. Is the Membrane-Spanning Domain Where We Think It is? *Biochemistry*. **1998**, *37*, 11064–11077.
- 51 Hoyer, W.; Grönwall, C.; Jonsson, A.; Ståhl, S.; Härd, T. Stabilization of a  $\beta$ -Hairpin in Monomeric Alzheimer's Amyloid- $\beta$  Peptide Inhibits Amyloid Formation. *Proc. Natl. Acad. Sci. U.S.A.* **2008**, *105*, 5099–5104.
- 52 Poulsen, S. A.; Watson, A. A.; Fairlie, D. P.; Craik, D. J. Solution Structures in Aqueous SDS Micelles of Two Amyloid Beta Peptides of Abeta(1–28) Mutated at the alpha-Secretase Cleavage Site (K16E, K16F). *J. Struct. Biol.* **2000**, *130*, 142–152.
- 53 Fonar, G.; Samson, A. O. NMR Structure of the Water Soluble A $\beta$ <sub>17-34</sub> Peptide. *Biosci. Rep.* **2014**, *34*, e00155.
- 54 Mirecka, E. A.; Shaykhalishahi, H.; Gauhar, A.; Akgül, Ş.; Lecher, J.; Willbold, D.; Stoldt, M.; Hoyer, W. Sequestration of a  $\beta$ -Hairpin for Control of  $\alpha$ -Synuclein Aggregation. *Angew. Chem. Int. Ed. Engl.* **2014**, *53*, 4227–4230.
- 55 Rao, J. N.; Jao, C. C.; Hegde, B. G.; Langen, R.; Ulmer, T. S. A Combinatorial NMR and EPR Approach for Evaluating the Structural Ensemble of Partially Folded Proteins. *J. Am. Chem. Soc.* **2010**, *132*, 8657–8668.
- 56 Ulmer, T. S.; Bax, A.; Cole, N. B.; Nussbaum, R. L. Structure and Dynamics of Micelle-Bound Human alpha-Synuclein. *J. Biol. Chem.* **2005**, *280*, 9595–9603.
- 57 Rodriguez Camargo, D. C.; Tripsianes, K.; Buday, K.; Franko, A.; Göbl, C.; Hartlmüller, C.; Sarkar, R.; Aichler, M.; Mettenleiter, G.; Schulz, M.; Böddrich, A.; Erck, C.; Martens, H.; Walch, A. K.; Madl, T.; Wanker, E. E.; Conrad, M.; de Angelis, M. H.; Reif, B. The Redox

- Environment Triggers Conformational Changes and Aggregation of hIAPP in Type II Diabetes. *Sci. Rep.* **2017**, *7*, 44041.
- 58 Mirecka, E. A.; Feuerstein, S.; Gremer, L.; Schröder, G. F.; Stoldt, M.; Willbold, D.; Hoyer, W.  $\beta$ -Hairpin of Islet Amyloid Polypeptide Bound to an Aggregation Inhibitor. *Sci. Rep.* **2016**, *6*, 33474.
- 59 Nanga, R. P.; Brender, J. R.; Xu, J.; Hartman, K.; Subramanian, V.; Ramamoorthy, A. Three-Dimensional Structure and Orientation of Rat Islet Amyloid Polypeptide Protein in a Membrane Environment by Solution NMR Spectroscopy. *J. Am. Chem. Soc.* **2009**, *131*, 8252–8261.
- 60 Patil, S. M.; Xu, S.; Sheftic, S. R.; Alexandrescu, A. T. Dynamic alpha-Helix Structure of Micelle-Bound Human Amylin. *J. Biol. Chem.* **2009**, *284*, 11982–11991.
- 61 Nanga, R. P.; Brender, J. R.; Vivekanandan, S.; Ramamoorthy, A. Structure and Membrane Orientation of IAPP in its Natively Amidated Form at Physiological pH in a Membrane Environment. *Biochim. Biophys. Acta.* **2011**, *1808*, 2337–2342.
- 62 Laganowsky, A.; Liu, C.; Sawaya, M. R.; Whitelegge, J. P.; Park, J.; Zhao, M.; Pensalfini, A.; Soriaga, A. B.; Landau, M.; Teng, P. K.; Cascio, D.; Glabe, C.; Eisenberg, D. Atomic View of a Toxic Amyloid Small Oligomer. *Science* **2012**, *335*, 1228–1231.
- 63 Sangwan, S.; Zhao, A.; Adams, K. L.; Jayson, C. K.; Sawaya, M. R.; Guenther, E. L.; Pan, A. C.; Ngo, J.; Moore, D. M.; Soriaga, A. B.; Do, T. D.; Goldschmidt, L.; Nelson, R.; Bowers, M. T.; Koehler, C. M.; Shaw, D. E.; Novitch, B. G.; Eisenberg, D. S. Atomic Structure of a Toxic, Oligomeric Segment of SOD1 Linked to Amyotrophic Lateral Sclerosis (ALS). *Proc. Natl. Acad. Sci. U.S.A.* **2017**, *114*, 8770–8775.

- 64 Apostol, M. I.; Perry, K.; Surewicz, W. K. Crystal Structure of a Human Prion Protein Fragment Reveals a Motif for Oligomer Formation. *J. Am. Chem. Soc.* **2013**, *135*, 10202–10205.
- 65 Pham J. D.; Chim, N.; Goulding, C. W.; Nowick, J. S. Structures of Oligomers of a Peptide from  $\beta$ -Amyloid. *J. Am. Chem. Soc.* **2013**, *135*, 12460–12467.
- 66 Kreutzer, A. G.; Spencer, R. K.; McKnelly, K. J.; Yoo, S.; Hamza, I. L.; Salveson, P. J.; Nowick, J. S. A Hexamer of a Peptide Derived from  $A\beta_{16-36}$ . *Biochemistry* **2017**, *ASAP* doi: 10.1021/acs.biochem.7b00831.
- 67 Liu, C.; Sawaya, M. R.; Cheng, P. N.; Zheng, J.; Nowick, J. S.; Eisenberg, D. Characteristics of Amyloid-Related Oligomers Revealed by Crystal Structures of Macrocyclic  $\beta$ -Sheet Mimics. *J. Am. Chem. Soc.* **2011**, *133*, 6736–6744.
- 68 Spencer, R. K.; Li, H.; Nowick, J. S. X-ray Crystallographic Structures of Trimers and Higher-Order Oligomeric Assemblies of a Peptide Derived from  $A\beta_{17-36}$ . *J. Am. Chem. Soc.* **2014**, *136*, 5595–5598.
- 69 Kreutzer, A. G.; Yoo, S.; Spencer, R. K.; Nowick, J. S. Stabilization, Assembly, and Toxicity of Trimers Derived from  $A\beta$ . *J. Am. Chem. Soc.* **2017**, *139*, 966–975.
- 70 Kreutzer, A. G.; Hamza, I. L.; Spencer, R. K.; Nowick, J. S. X-ray Crystallographic Structures of a Trimer, Dodecamer, and Annular Pore Formed by an  $A\beta_{17-36}$   $\beta$ -Hairpin. *J. Am. Chem. Soc.* **2016**, *138*, 4634–4642.
- 71 Cheng, P. N.; Liu, C.; Zhao, M.; Eisenberg, D.; Nowick, J. S. Amyloid  $\beta$ -Sheet Mimics that Antagonize Protein Aggregation and Reduce Amyloid Toxicity. *Nat. Chem.* **2012**, *4*, 927–933.

- 72 Salveson, P. J.; Spencer, R. K.; Nowick, J. S. X-ray Crystallographic Structure of Oligomers Formed by a Toxic  $\beta$ -Hairpin Derived from  $\alpha$ -Synuclein: Trimers and Higher-Order Oligomers. *J. Am. Chem. Soc.* **2016**, *138*, 4458–4467.
- 73 Liu, C.; Zhao, M.; Jiang, L.; Cheng, P. N.; Park, J.; Sawaya, M. R.; Pensalfini, A.; Gou, D.; Berk, A. J.; Glabe, C. G.; Nowick, J.; Eisenberg, D. Out-of-Register  $\beta$ -Sheets Suggest a Pathway to Toxic Amyloid Aggregates. *Proc. Natl. Acad. Sci. U.S.A.* **2012**, *109*, 20913–20918.
- 74 Spencer, R. K.; Kreutzer, A. G.; Salveson, P. J.; Li, H.; Nowick, J. S. X-ray Crystallographic Structures of Oligomers of Peptides Derived from  $\beta_2$ -Microglobulin. *J. Am. Chem. Soc.* **2015**, *137*, 6304–6311.
- 75 Wang, Y.; Kreutzer, A. G.; Truex, N. L.; Nowick, J. S. A Tetramer Derived from Islet Amyloid Polypeptide. *J. Org. Chem.* **2017**, *82*, 7905–7912.
